# Supplementary material for: Mutant p53 shapes the enhancer landscape of cancer cells in response to chronic immune signaling
Source: PubMed Central journal article supplement (PMC5622043; doi:10.1038/s41467-017-01117-y), 2017-09-29
Supplement: 41467_2017_1117_MOESM2_ESM.pdf [file 41467_2017_1117_MOESM2_ESM.pdf]

## **Description of Additional Supplementary Files**

File Name: Supplementary Data 1

Description: List of the TNF-responsive genes that are differentially regulated by mutp53 and that correspond to the heat map of the RNA-seq data represented in Figure 1d.
